# Supplementary material for: Prognostic utility of RECIP 1.0 with manual and AI-based segmentations in biochemically recurrent prostate cancer from [68Ga]Ga-PSMA-11 PET images
Source: Springer Nature journal article supplement (doi:10.1007/s00259-023-06382-2), 2023-08-08
Supplement: MOESM1 [file 25899630]

Supplementary Table 1: Summary of the PET scanner parameters for each institution at which patients were imaged.

| No. Patients | Imaging Centre | Scanner              | Reconstruction Method          | Pixel Spacing (mm <sup>2</sup> ) |
|--------------|----------------|----------------------|--------------------------------|----------------------------------|
| 176          | SCGH           | Siemens Biograph 64  | PSF + Time of Flight (2i 21s)  | 4.07 × 4.07                      |
| 23           | FSH            | Siemens Biograph 128 | OSEM + Time of Flight (2i 21s) | 4.07 × 4.07                      |
